# Supplementary material for: Evaluation of remote sensing algorithms for estimating actual evapotranspiration in arid agricultural environments
Source: Copernicus journal article supplement (doi:10.5194/hess-2024-351), 2025-02-03
Supplement: Supplementary file 1 [file hess-2024-351-supplement.pdf]

**Table (S1).** Details of Landsat 8 imageries used for ETa modelling

| Path/Row      | Date Acquired     | Satellite pass time | Cloud cover % |
|---------------|-------------------|---------------------|---------------|
| 172/79        | 2019 September 09 | 08:15:19            | 0.01          |
|               | 2019 September 25 | 08:15:25            | 0.1           |
|               | 2019 October 27   | 08:15:28            | 0             |
|               | 2019 November 12  | 08:15:26            | 0.1           |
|               | 2019 December 14  | 08:15:23            | 0.2           |
|               | 2020 January 15   | 08:15:15            | 0.2           |
|               | 2020 January 31   | 08:15:10            | 0             |
|               | 2020 April 20     | 08:15:04            | 0.01          |
|               | 2020 May 06       | 08:15:06            | 0             |
|               | 2020 June 07      | 08:15:13            | 0.04          |
|               | 2020 June 23      | 08:15:16            | 0             |
|               | 2020 July 09      | 08:15:14            | 0             |
|               | 2020 July 25      | 08:15:03            | 0.03          |
|               | 2020 August 10    | 08:15:03            | 0.01          |
|               | 2020 September 11 | 08:15:18            | 0             |
|               | 2020 September 27 | 08:15:23            | 0             |
|               | 2020 October 13   | 08:15:25            | 0.05          |
|               | 2021 January 17   | 08:15:14            | 0             |
|               | 2021 February 18  | 08:15:08            | 0.01          |
|               | 2021 March 22     | 08:14:53            | 0.2           |
| 2021 April 23 | 08:14:42          | 0.02                |               |
| 2021 May 09   | 08:14:36          | 0                   |               |

The selected metrics used are given using Eqs. (S1)-(S6):

$$r = \frac{\sum_{i=1}^n (x_i - \bar{x})(y_i - \bar{y})}{\sqrt{(\sum_{i=1}^n (x_i - \bar{x})^2) \sum_{i=1}^n (y_i - \bar{y})^2}} \quad \text{Equation (S1)}$$

$$R^2 = 1 - \frac{\sum_{i=1}^N (y_i - y'_i)^2}{\sum_{i=1}^N (y_i - \bar{y})^2} \quad \text{Equation (S2)}$$

$$RMSE = \sqrt{\frac{\sum_{i=1}^N (y_i - y'_i)^2}{N}} \quad \text{Equation (S3)}$$

$$MAE = \frac{1}{N} \sum_{i=1}^N |y_i - y'_i| \quad \text{Equation (S4)}$$

$$SE = \frac{s}{\sqrt{n}} \quad \text{Equation (S5)}$$

$$Bias = \bar{x} - \bar{y} \quad \text{Equation (S6)}$$

where N, y, y', y'' represent the number of observations, measured values, predicted values, and mean of measured values, respectively. The term "s" is the sample standard deviation, while "n" is the number of samples.

**Table (S2).** Kc-NDVI relationship for determining the variability of Kc throughout the study area

| Model season        | Kc model                       | R <sup>2</sup> |
|---------------------|--------------------------------|----------------|
| Model 1 (2019)      | $Kc = 0.83 \times NDVI + 0.15$ | 0.93           |
| Model 2 (2020)      | $Kc = 0.84 \times NDVI + 0.2$  | 0.8            |
| Model 3 (2019–2020) | $Kc = 0.51 \times NDVI + 0.42$ | 0.92           |
| Model 4 (2021)      | $Kc = 1.02 \times NDVI - 0.07$ | 0.88           |
| Ensemble model      | $Kc = 0.8 \times NDVI + 0.17$  | 0.99           |

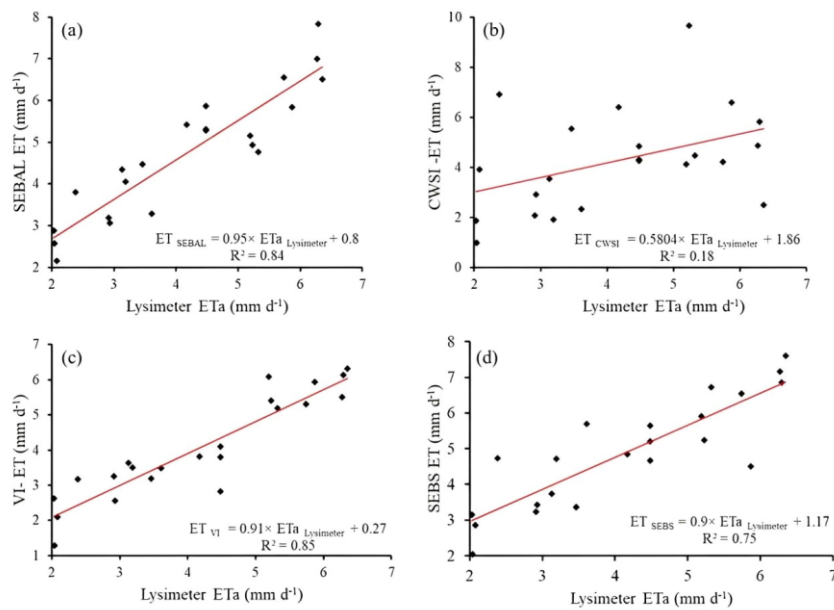

**Figure (S1).** Relationship between Measured and estimated ETa at field-scale.

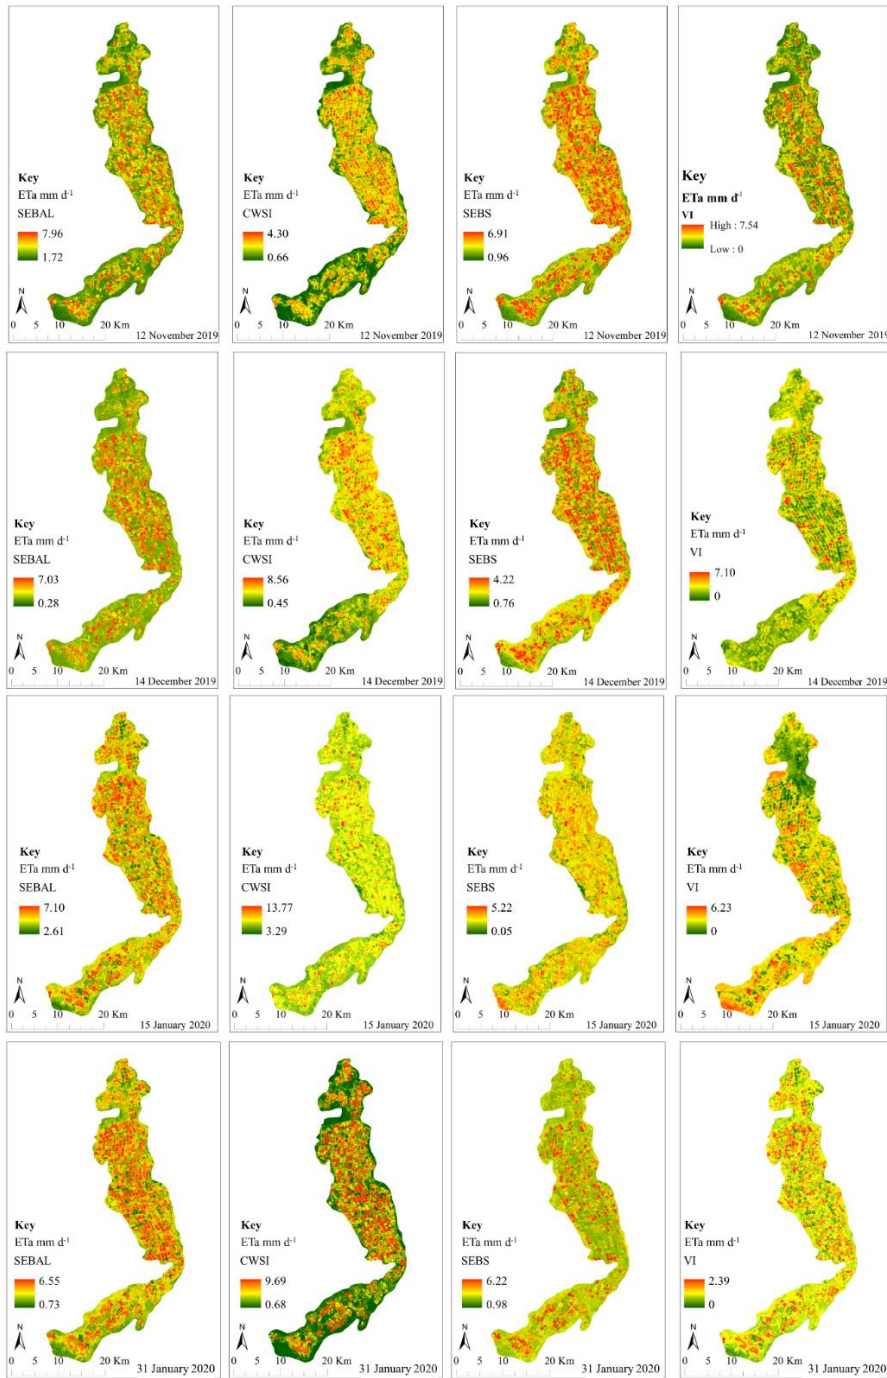

**Figure (S2). Spatial distribution of ETa within the Vaalharts irrigation scheme for SEBAL, CWSI, SEBS and VI algorithms from 12 November 2019 to 31 January 2020.**

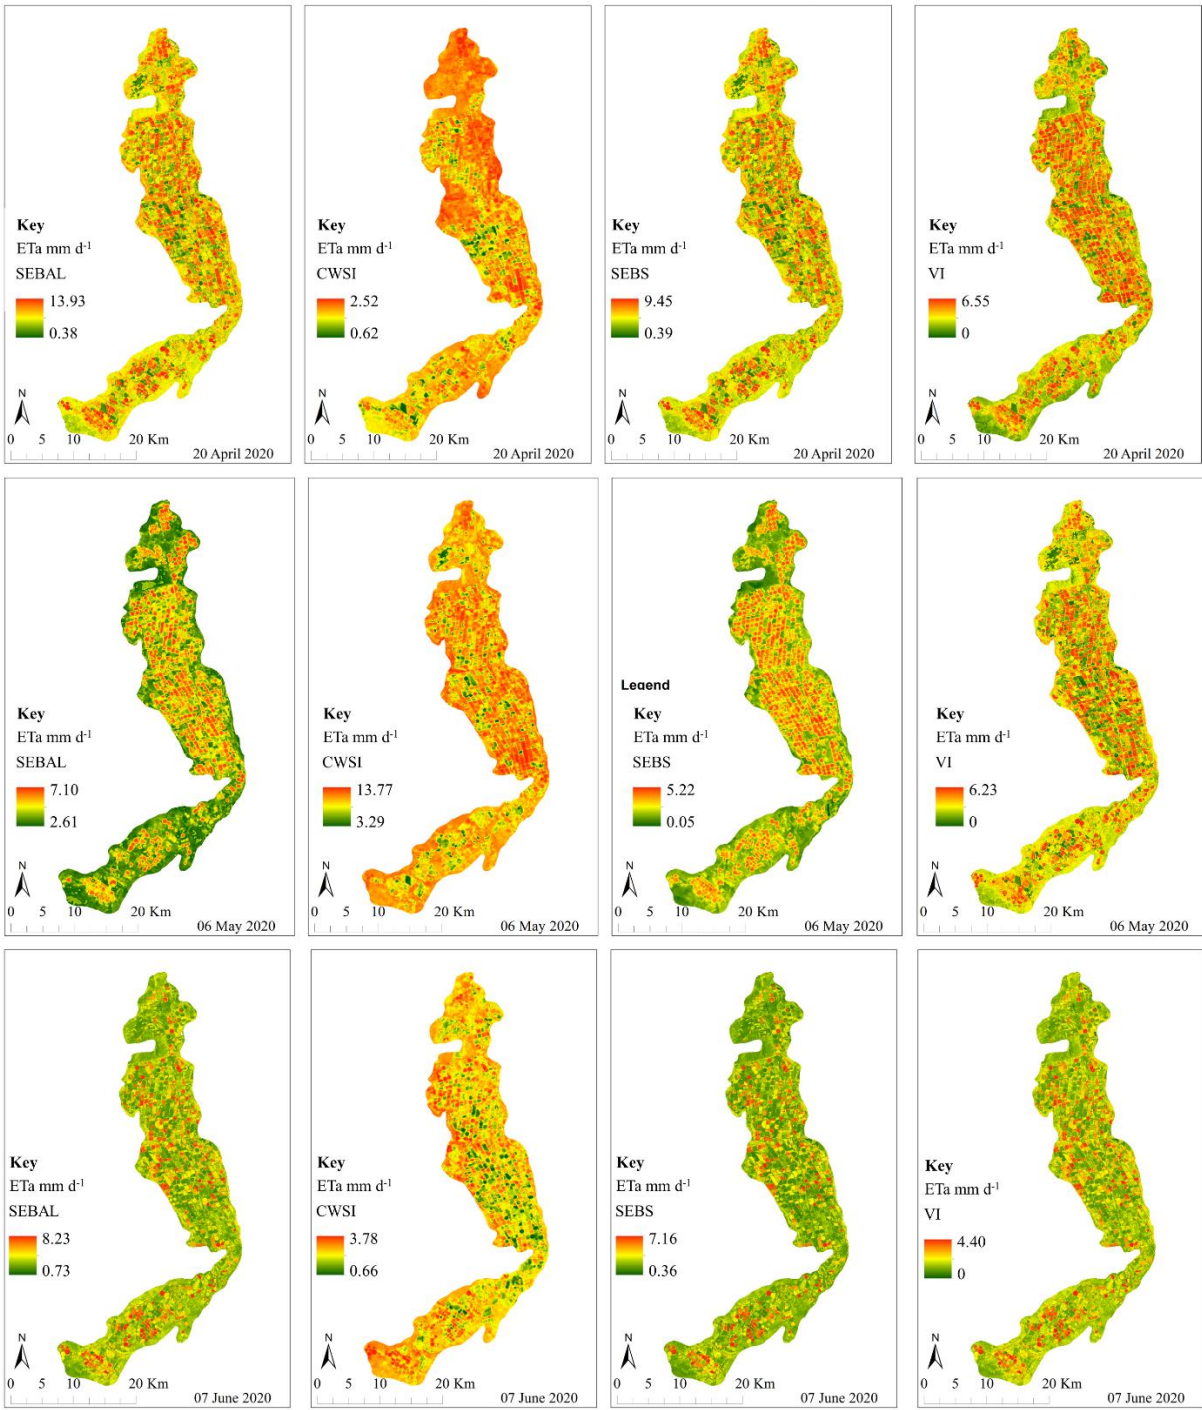

**Figure (S3). Spatial distribution of ETa within the Vaalharts irrigation scheme for SEBAL, CWSI, SEBS and VI algorithms from 20 April 2020 to 07 June 2020.**

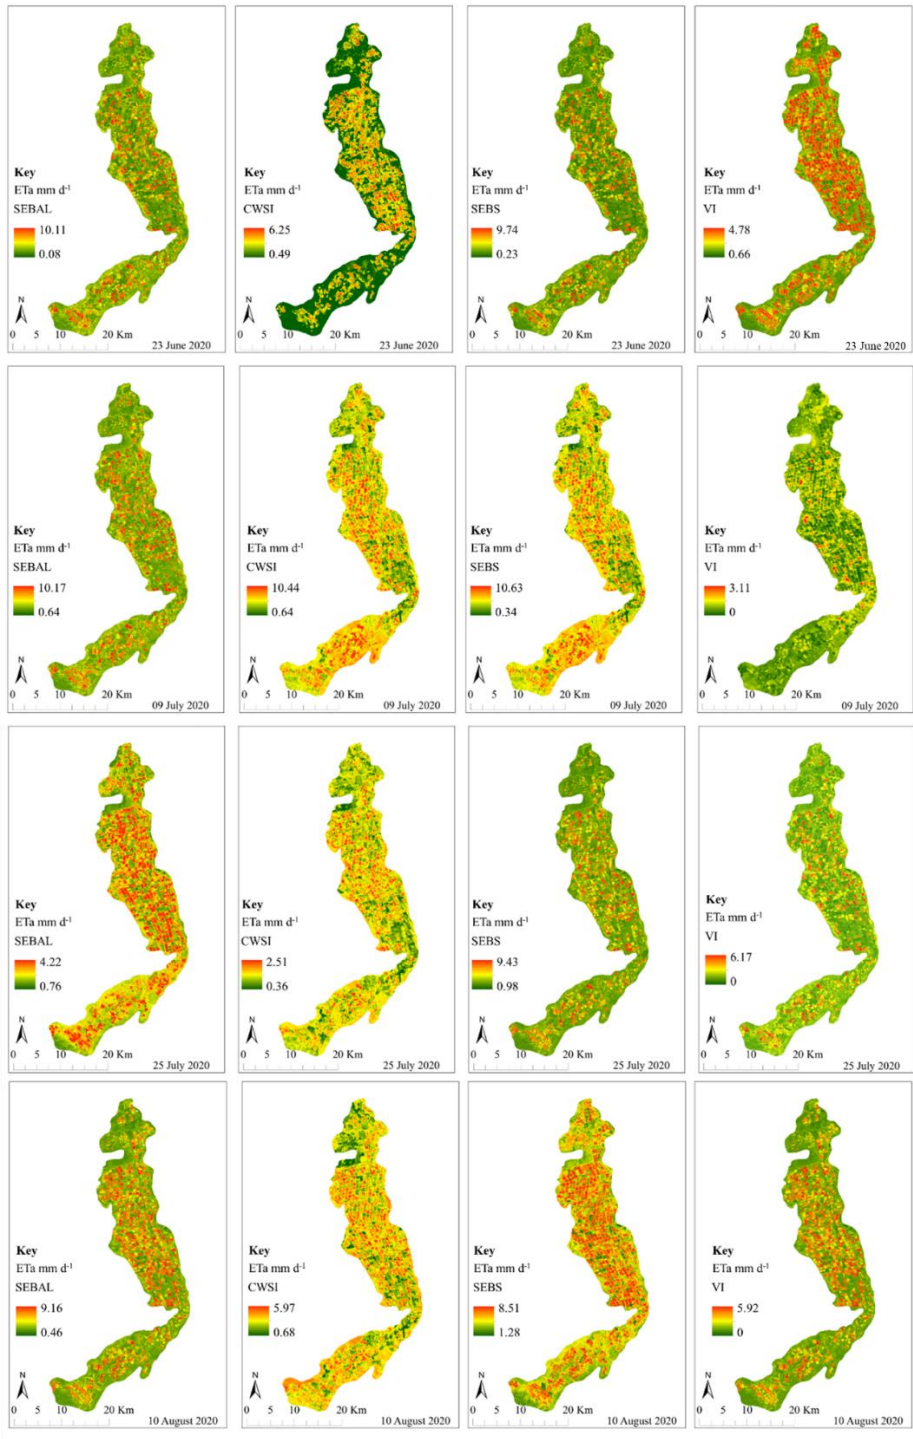

Figure (S4). Spatial distribution of ETa within the Vaalharts irrigation scheme for SEBAL, CWSI, SEBS and VI algorithms from 23 June 2020 to 10 August 2020.

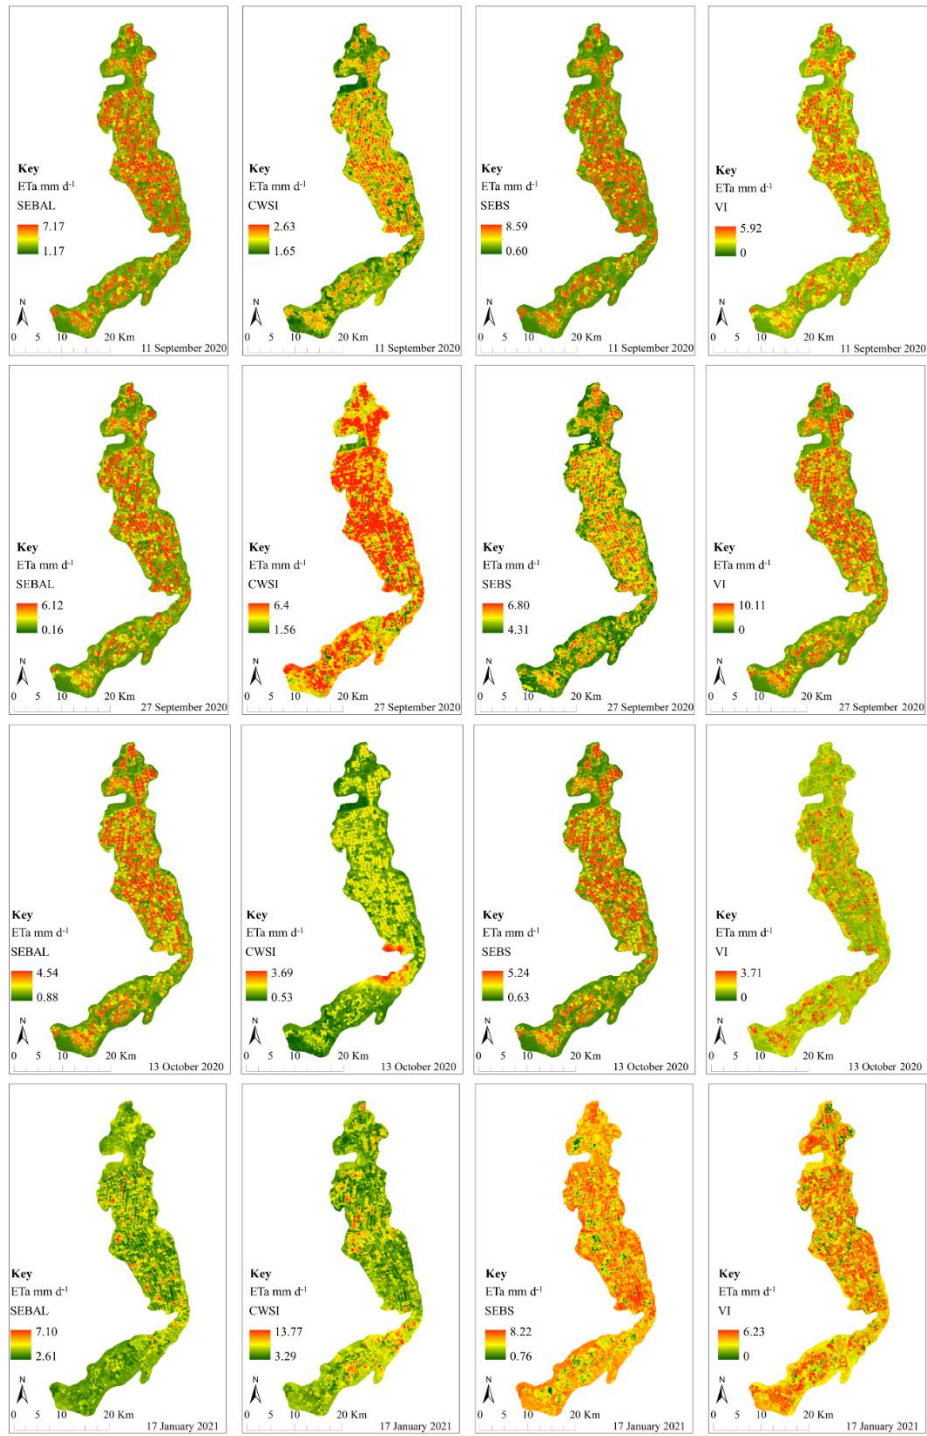

**Figure (S5).** Spatial distribution of ETa within the Vaalharts irrigation scheme for SEBAL, CWSI, SEBS and VI algorithms from 11 September 2020 to 17 January 2021.

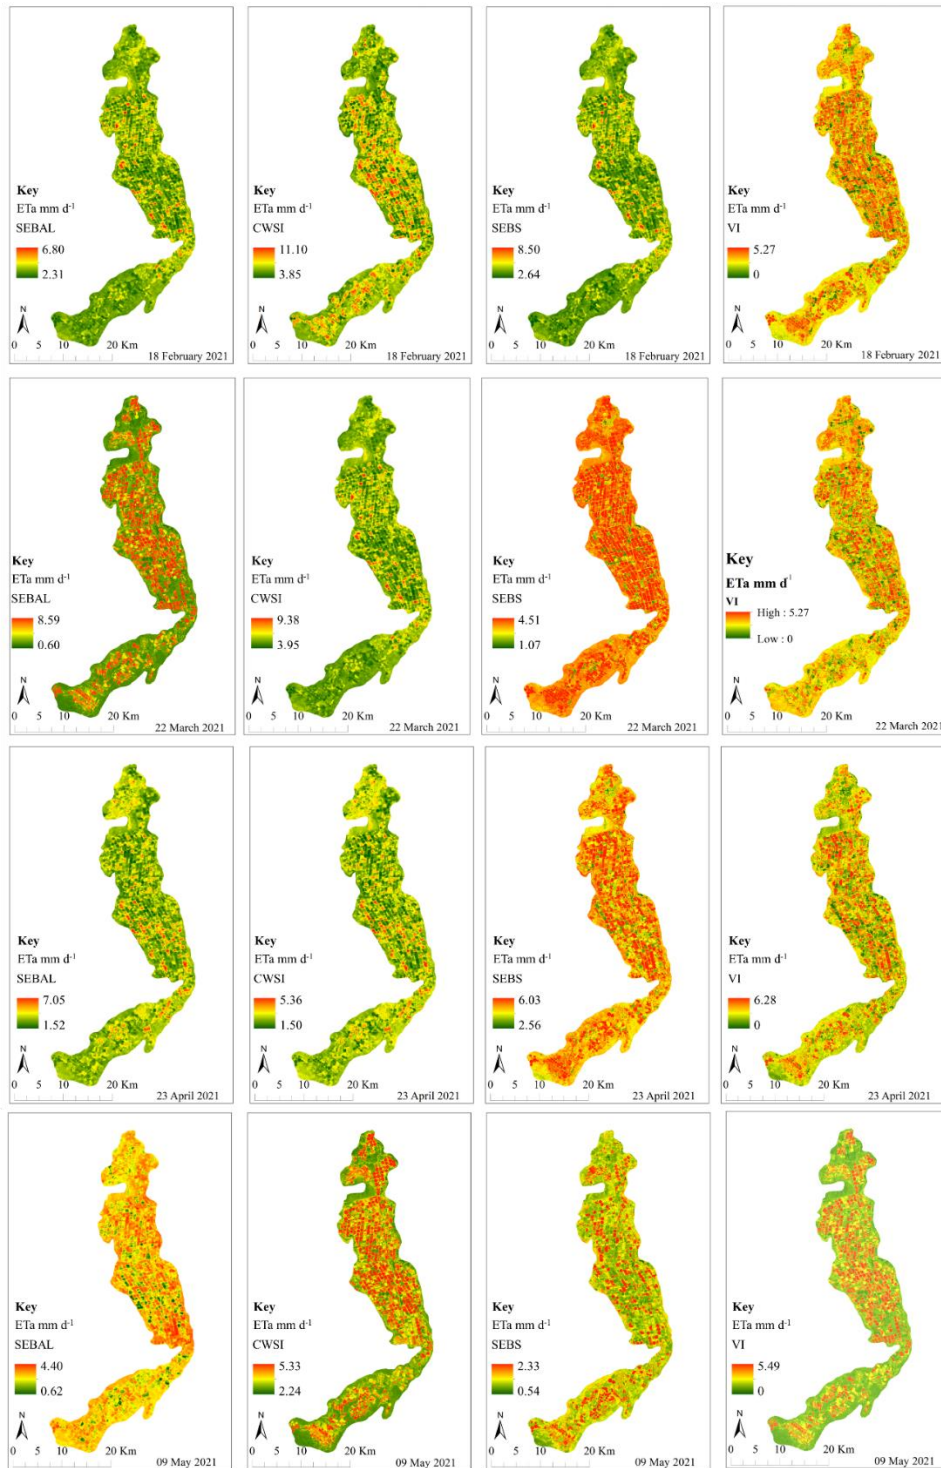

**Figure (S6).** Spatial distribution of ETa within the Vaalharts irrigation scheme for SEBAL, CWSI, SEBS and VI algorithms from 18 February 2021 to 9 May 2021.
