# Supplementary material for: Evaluation of remote sensing algorithms for estimating actual evapotranspiration in arid agricultural environments
Source: Copernicus journal article supplement (doi:10.5194/hess-2024-351), 2025-02-03
Supplement: Supplementary file [file hess-2024-351-AC1-supplement.pdf]

**Reviewer's comment:** Highlighted “in arid regions facing water scarcity”.

**Authors:** Thank you for highlighting this, we have removed “arid” for fluency.

**Reviewer's comment:** highlighted “level of an irrigation Scheme”.

**Authors:** Not sure what this means, there is no clear comment.

**Reviewer** highlighted “G” on equation 5.

**Authors:** Thanks for highlighting the inconsistency use of this term, we have fixed “G” for consistency to: Go.

**Reviewer** highlighted “DNVI” error.

**Authors:** Thanks for highlighting this typing error, we have fixed “DNVI” to NDVI.

**Reviewer** highlighted “Su (2002)” and suggested addition of Su (1999).

**Authors:** We have included Su (1999) in text and reference list.

**Reviewer** highlighted “Go” and suggested it be used throughout the document for consistency.

**Authors:** Thanks for picking this up, as done across the document, we used Go throughout for consistency.

**Reviewer** asked, “at the experimental site?”

**Authors:** Thanks for this question, it makes our paper clearer, we have revised the words from field scale to “experimental site”.

**Reviewer** highlighted “multi-stations” on Figure 7 caption.

**Authors:** Thanks for the comment, we have revised the words to experimental farm.

**Reviewer** asked, is this section covering the cumulative ETa from 2019 to 2021 and suggested a Revised Section title.

**Authors:** Thanks for the suggestion, we have revised the title to: Comparison of quantified ETa from all algorithms and measurements from 2019 winter barley to 2021 season.

**Reviewer** suggested to authors: please shorten evaluation of algorithms at weather station sites.

**Answer:** Thanks for this, we have revised to “evaluation of algorithms at weather station sites”.

**Reviewer:** how do the models compare between each other per site?

**Authors:** Thanks for this valuable question, we have included a section above the table which explains the model performance across sites: The SEBAL performs best across all sites with high correlation coefficients between 0.91 and 0.96, RMSE from 0.31 to 0.89 mm d<sup>-1</sup>. However, SEBS demonstrates moderate accuracy with higher RMSE values between 0.93–1.59 mm d<sup>-1</sup>. The VI-ETa was found to be better than SEBS in some cases but less consistent than SEBAL. CWSI demonstrated the worst performance across all evaluated sites.

**Reviewer:** these are weather station sites?

**Authors:** Yes, thanks for this comment, these are weather station locations, we have revised the table title including “weather station sites”.
